# Supplementary material for: Monitoring Changes in the Volatile Profile of Ecuadorian Cocoa during Different Steps in Traditional On-Farm Processing
Source: MDPI journal article supplement (doi:10.3390/plants12223904), 2023-11-20
Supplement: s1 [file s1]

# Monitoring Changes in the Volatile Profile of Ecuadorian Cocoa during Different Steps in Traditional On-Farm Processing

Cyntia Yadira Erazo Solorzano <sup>1</sup>, Diego Armando Tuárez García <sup>1</sup>, Carlos Edison Zambrano <sup>2</sup>, José Manuel Moreno-Rojas <sup>3,4,\*</sup> and Raquel Rodríguez Solana <sup>3,5,\*</sup>

<sup>1</sup> Faculty of Industry and Production Sciences, State Technical University of Quevedo, Av. Walter Andrade, Km 1.5 Via Santo Domingo, Quevedo 120301, Ecuador; cerazo@uteq.edu.ec (C.Y.E.S.); dtuarez@uteq.edu.ec (D.A.T.G.)

<sup>2</sup> Faculty of Business Sciences, State Technical University of Quevedo, Av. Walter Andrade, Km 1.5 Via Santo Domingo, Quevedo 120301, Ecuador; cezambrano@uteq.edu.ec

<sup>3</sup> Department of Agrifood Industry and Food Quality, Andalusian Institute of Agricultural and Fisheries Research and Training (IFAPA), Alameda del Obispo, Avda. Menéndez Pidal s/n, 14004 Córdoba, Spain

<sup>4</sup> Foods for Health Group, Instituto Maimónides de Investigación Biomédica de Córdoba (IMIBIC), 14004 Córdoba, Spain

<sup>5</sup> MED–Mediterranean Institute for Agriculture, Environment and Development & CHANGE–Global Change and Sustainability Institute, Faculdade de Ciências e Tecnologia, Universidade do Algarve, Campus de Gambelas, 8005-139 Faro, Portugal

\* Correspondence: josem.moreno.rojas@juntadeandalucia.es (J.M.M.-R.); raquel.rodriguez.solana@juntadeandalucia.es (R.R.S.)

**Table S1.** Volatile compounds identified in fresh, (anaerobic and aerobic) fermented, and dried bulk (Forastero and CCN51) and fine-flavour (ETT103 and LR14) cocoa, with the corresponding retention index (experimental and theoretical (NIST)) and the selected quantification ion.

|    | Compound                                         | IUPAC Name                                       | RI <sub>calculated</sub> | RI <sub>NIST</sub>                    | Ion |
|----|--------------------------------------------------|--------------------------------------------------|--------------------------|---------------------------------------|-----|
|    | <b>Aldehydes</b>                                 | <b>Aldehydes</b>                                 |                          |                                       |     |
| 1  | 2-Methyl butanal                                 | 2-Methyl butanal                                 | 920                      | 922                                   | 57  |
| 2  | Hexanal                                          | Hexanal                                          | 1087                     | 1086                                  | 56  |
| 3  | (E)-2-Octenal                                    | (E)--Oct-2-enal                                  | 1443                     | 1443                                  | 70  |
| 4  | 3-(Methylthio)propanal                           | 3-Methylsulfanylpropanal                         | 1471                     | 1471                                  | 104 |
| 5  | Benzaldehyde                                     | Benzaldehyde                                     | 1545                     | 1545                                  | 77  |
| 6  | Benzacetaldehyde                                 | 2-Phenylacetaldehyde                             | 1664                     | 1663                                  | 91  |
| 7  | $\alpha$ -Ethylidenbenzeneacetaldehyde           | (Z)-2-Phenylbut-2-enal                           | 1955                     | 1961                                  | 117 |
|    |                                                  | <b>Alcohols</b>                                  |                          |                                       |     |
| 8  | 2-Methylbut-3-en-2-ol                            | 2-Methylbut-3-en-2-ol                            | 1056                     | 1058                                  | 71  |
| 9  | 2-Methylpropanol                                 | 2-Methylpropan-1-ol                              | 1106                     | 1105                                  | 74  |
| 10 | 3-Methyl-2-butanol + 2-pentanol                  | 3-Methylbutan-2-ol +                             | 1131                     | 1124/                                 | 73  |
| 11 | 3-Methyl-butanol                                 | 3-Methylbutan-1-ol                               | 1213                     | 1213                                  | 55  |
| 12 | 2-Hexanol                                        | Hexan-2-ol                                       | 1226                     | 1226                                  | 69  |
| 13 | 2-Methyl-butanol                                 | 2-Methylbutan-1-ol                               | 1229                     | 1224                                  | 57  |
| 14 | 1-Pentanol                                       | Pentan-1-ol                                      | 1255                     | 1255                                  | 55  |
| 15 | 2-Heptanol                                       | Heptan-2-ol                                      | 1324                     | 1324                                  | 55  |
| 16 | 4-Methyl-5-hexen-2-ol (Probably) <sup>†,††</sup> | 4-Methylhex-5-en-2-ol (Probably) <sup>†,††</sup> | 1347                     | 1344 <sup>§</sup> /1348 <sup>§§</sup> | 81  |
| 17 | 1-Hexanol                                        | Hexan-1-ol                                       | 1360                     | 1360                                  | 56  |
| 18 | 2-Octanol                                        | Octan-2-ol                                       | 1422                     | 1422                                  | 55  |
| 19 | 2-Nonanol                                        | Nonan-2-ol                                       | 1522                     | 1521                                  | 69  |
| 20 | $\alpha$ -Phenylethanol                          | 1-Phenylethanol                                  | 1826                     | 1827                                  | 79  |
| 21 | Benzyl Alcohol                                   | Phenylmethanol                                   | 1893                     | 1893                                  | 79  |

|                      |                                          |                                                 |      |                   |     |
|----------------------|------------------------------------------|-------------------------------------------------|------|-------------------|-----|
| 22                   | 2-Phenylethanol                          | 2-Phenylethanol                                 | 1930 | 1929              | 91  |
| <b>Acids</b>         |                                          |                                                 |      |                   |     |
| 23                   | Acetic acid                              | Acetic acid                                     | 1461 | 1460              | 60  |
| 24                   | Propanoic acid                           | Propanoic acid                                  | 1556 | 1556              | 74  |
| 25                   | 2-Methyl-propanoic acid                  | 2-Methylpropanoic acid                          | 1578 | 1578              | 73  |
| 26                   | 2/3-Methyl-butanoic acid                 | 2/3-Methylbutanoic acid                         | 1685 | 1685/1687         | 60  |
| <b>Ketones</b>       |                                          |                                                 |      |                   |     |
| 27                   | 2-Pentanone                              | Pentan-2-one                                    | 986  | 985               | 86  |
| 28                   | 2-Heptanone + 5-methyl-2-hexanone        | Heptan-2-one +                                  | 1188 | 1188/             | 58  |
| 29                   | 2-Octanone                               | Octan-2-one                                     | 1290 | 1290              | 58  |
| 30                   | 3-Hydroxy-2-butanone (acetoin)           | 3-Hydroxybutan-2-one (acetoin)                  | 1295 | 1295              | 88  |
| 31                   | 2-Nonanone                               | Nonan-2-one                                     | 1389 | 1389              | 58  |
| 32                   | 3,6-Heptanedione (probably) †            | Heptane-2,5-dione (probably) †                  | 1595 | 1592 <sup>#</sup> | 57  |
| 33                   | Acetophenone                             | 1-Phenylethanone                                | 1674 | 1671              | 105 |
| <b>Esters</b>        |                                          |                                                 |      |                   |     |
| 34                   | Ethyl acetate                            | Ethyl acetate                                   | 904  | 904               | 61  |
| 35                   | 2-Pentyl acetate                         | Pentan-2-yl acetate                             | 1078 | 1075              | 87  |
| 36                   | 2/3-Methylbutyl acetate                  | 2/3-Methylbutyl acetate                         | 1125 | 1125              | 70  |
| 37                   | Ethyl hexanoate                          | Ethyl hexanoate                                 | 1245 | 1245              | 88  |
| 38                   | 1-Methylhexyl acetate/2-heptanol acetate | Heptan-2-yl acetate/Heptan-2-yl acetate         | 1273 | 1266              | 98  |
| 39                   | Ethyl octanoate                          | Ethyl octanoate                                 | 1443 | 1445              | 88  |
| 40                   | Benzyl acetate                           | Benzyl acetate                                  | 1747 | 1746              | 108 |
| 41                   | Ethyl benzeneacetate                     | Ethyl 2-phenylacetate                           | 1802 | 1800              | 91  |
| 42                   | β-Phenylethyl acetate                    | 2-Phenylethyl acetate                           | 1833 | 1833              | 104 |
| 43                   | Butyl benzoate                           | Butyl benzoate                                  | 1857 | 1839              | 105 |
| <b>Terpenes</b>      |                                          |                                                 |      |                   |     |
| 44                   | β-Myrcene                                | 7-Methyl-3-methylideneocta-1,6-diene            | 1161 | 1161              | 93  |
| 45                   | D-Limonene                               | (4R)-1-Methyl-4-prop-1-en-2-ylcyclohexene       | 1202 | 1202              | 68  |
| 46                   | Ocimene (Isomers E and Z)                | 3,7-Dimethylocta-1,3,6-triene (isomers E and Z) | 1244 | 1251              | 93  |
| 47                   | γ-Pyrone                                 | 1,5,5-Trimethyl-6-methylidenecyclohexene        | 1382 | 1406              | 121 |
| 48                   | Linalool oxide I                         | 6-Methyl-2-(oxiran-2-yl)hept-5-en-2-ol I        | 1450 | 1450              | 94  |
| 49                   | Linalool oxide II                        | 6-Methyl-2-(oxiran-2-yl)hept-5-en-2-ol II       | 1478 | 1478              | 94  |
| 50                   | Linalool                                 | 3,7-Dimethylocta-1,6-dien-3-ol                  | 1552 | 1552              | 71  |
| <b>Lactones</b>      |                                          |                                                 |      |                   |     |
| 51                   | Valerolactone                            | 5-Methyloxolan-2-one                            | 1635 | 1629              | 56  |
| 52                   | Butyrolactone                            | Oxolan-2-one                                    | 1656 | 1651              | 86  |
| <b>Miscellaneous</b> |                                          |                                                 |      |                   |     |
| 53                   | trimethyl-Pyrazine                       | 2,3,5-Trimethylpyrazine                         | 1414 | 1414              | 122 |
| 54                   | Isophorone                               | 3,5,5-Trimethylcyclohex-2-en-1-one              | 1618 | 1615              | 138 |
| 55                   | Benzonitrile                             | Benzonitrile                                    | 1629 | 1629              | 103 |
| 56                   | o-Guaiacol                               | 2-Methoxyphenol                                 | 1881 | 1889              | 109 |

Compounds tentative identified according to the retention index (RI) calculated in previous works: 4-methyl-5-hexen-2-ol, † Costa Castro Alves et al. [17] and †† Li [18]; 3,6-Heptanedione, ‡ Raffo et al. [19]. RI: retention index; Ion Q: ion of quantification.

**Table S2.** Two way ANOVA results (*p* values) for main effects and interactions of processing (fresh, anaerobic and aerobic fermentations and drying) and varieties (Forastero, CCN-51, ETT-103 and LR-14) on the volatile profile of cocoa samples.

| Compound                        | Processin | Variet       | Processing × | Compound                          | Processin    | Variet       | Processing × | Compound              | Processin    | Variet       | Processing × |
|---------------------------------|-----------|--------------|--------------|-----------------------------------|--------------|--------------|--------------|-----------------------|--------------|--------------|--------------|
| 2-Methyl butanal                | <0.001    | 0.088        | <0.001       | Acetic acid                       | <0.001       | 0.054        | <b>0.018</b> | β-Myrcene             | 0.176        | <0.001       | <b>0.001</b> |
| Hexanal                         | <0.001    | <0.001       | <0.001       | Propanoic acid                    | <0.001       | <0.001       | <0.001       | D-Limonene            | <0.001       | <0.001       | <0.001       |
| (E)-2-Octenal                   | <0.001    | <0.001       | <0.001       | 2-Methyl-propanoic acid           | <0.001       | <b>0.001</b> | <0.001       | Ocimene (E and        | <b>0.001</b> | <0.001       | <0.001       |
| 3-(Methylthio)propanal          | <0.001    | <0.001       | <0.001       | 2/3-Methyl-butanoic acid          | <0.001       | <0.001       | <0.001       | γ-Pyronene            | <b>0.001</b> | <b>0.001</b> | <0.001       |
| Benzaldehyde                    | <0.001    | <0.001       | <0.001       | <b>ΣAcids</b>                     | <0.001       | <b>0.009</b> | <b>0.001</b> | Linalool oxide I      | <b>0.001</b> | <0.001       | <0.001       |
| Benzacetaldehyde                | <0.001    | <0.001       | <0.001       | <b>F-value</b>                    | 74.32        | 5.45         | 5.53         | Linalool oxide II     | <0.001       | <0.001       | <0.001       |
| α-                              | <0.001    | <0.001       | <0.001       | 2-Pentanone                       | <0.001       | <0.001       | <0.001       | Linalool              | 0.093        | <0.001       | 0.039        |
| <b>ΣAldehydes</b>               | <0.001    | <0.001       | <0.001       | 2-Heptanone + 5-Methyl-2-hexanone | <0.001       | <0.001       | <0.001       | <b>ΣTerpenes</b>      | 0.155        | <0.001       | <0.001       |
| <b>F-value</b>                  | 136.68    | 21.46        | 15.32        | 2-Octanone                        | <0.001       | <0.001       | <b>0.002</b> | <b>F-value</b>        | 1.99         | 21.76        | 6.54         |
| 2-Methylbut-3-en-2-ol           | <0.001    | <0.001       | <0.001       | 3-Hydroxy-2-butanone (acetoin)    | <0.001       | <b>0.017</b> | 0.081        | γ-Valerolactone       | <0.001       | <0.001       | <0.001       |
| 2-Methyl-propanol               | <0.001    | <0.001       | <0.001       | 2-Nonanone                        | <b>0.024</b> | <0.001       | <0.001       | Butyrolactone         | <0.001       | <0.001       | <0.001       |
| 3-Methyl-2-butanol + 2-Pentanol | <0.001    | <b>0.001</b> | 0.057        | 3,6-Heptanedione (probably)       | <0.001       | <0.001       | 0.089        | <b>ΣLactones</b>      | <0.001       | <0.001       | <0.001       |
| 3-Methyl-butanol                | <0.001    | 0.388        | <0.001       | Acetophenone                      | <b>0.001</b> | <0.001       | <0.001       | <b>F-value</b>        | 500.84       | 59.37        | 59.37        |
| 2-Hexanol                       | <0.001    | <0.001       | <0.001       | <b>ΣKetones</b>                   | <0.001       | <0.001       | <0.001       | trimethyl-            | <0.001       | <0.001       | <0.001       |
| 2-Methyl-butanol                | <0.001    | <b>0.002</b> | <b>0.002</b> | <b>F-value</b>                    | 116.88       | 168.48       | 56.65        | Isophorone            | 0.412        | 0.412        | 0.468        |
| 1-Pentanol                      | <0.001    | <0.001       | <0.001       | Ethyl acetate                     | <0.001       | <0.001       | <0.001       | Benzonitrile          | <0.001       | <0.001       | <0.001       |
| 2-Heptanol                      | <0.001    | <0.001       | <0.001       | 2-Pentyl acetate                  | <0.001       | <0.001       | <0.001       | o-Guaiacol            | <0.001       | <0.001       | <0.001       |
| 4-Methyl-5-hexen-2-ol           | <0.001    | <0.001       | <0.001       | 2/3-Methylbutyl acetate           | <0.001       | 0.070        | <0.001       | <b>ΣMiscellaneous</b> | <0.001       | <0.001       | <0.001       |
| 1-Hexanol                       | <0.001    | <0.001       | <0.001       | Ethyl hexanoate                   | <0.001       | <0.001       | <0.001       | <b>F-value</b>        | 19.11        | 15.20        | 6.62         |
| 2-Octanol                       | <0.001    | <0.001       | <0.001       | 1-Methylhexyl acetate/2-Heptanol  | <0.001       | <b>0.001</b> | <b>0.001</b> |                       |              |              |              |
| 2-Nonanol                       | 0.275     | 0.055        | 0.301        | Ethyl octanoate                   | <0.001       | <0.001       | <0.001       |                       |              |              |              |
| α-Phenylethanol                 | <0.001    | <0.001       | <0.001       | Benzyl acetate                    | <0.001       | <0.001       | <0.001       |                       |              |              |              |
| Benzyl alcohol                  | <0.001    | <0.001       | <0.001       | Ethyl benzeneacetate              | <0.001       | 0.059        | <b>0.013</b> |                       |              |              |              |
| 2-Phenylethanol                 | <0.001    | 0.066        | <0.001       | β-Phenylethyl acetate             | <0.001       | <0.001       | <0.001       |                       |              |              |              |
| <b>ΣAlcohols</b>                | <0.001    | <0.001       | <0.001       | Butyl benzoate                    | <0.001       | <0.001       | <0.001       |                       |              |              |              |
| <b>F-value</b>                  | 97.33     | 63.86        | 34.87        | <b>ΣEsters</b>                    | <0.001       | <0.001       | <0.001       |                       |              |              |              |
|                                 |           |              |              | <b>F-value</b>                    | 907.85       | 88.21        | 100.48       |                       |              |              |              |

Statistically significant effects are marked in bold (*p* < 0.05)
